# Supplementary material
Source: HighWire-hosted journal article supplement (https://www.annfammed.org/highwire/filestream/7598/field_highwire_adjunct_files/1/shapiroapp2.pdf)
Supplement: shapiroapp2.pdf [file shapiroapp2.pdf]

Nygren P, Nelson HD, Klein J. Screening children for family violence: a review of the evidence for the US Preventive Services Task Force. *Ann Fam Med*. 2004;2:161-169.

<http://www.annfammed.org/cgi/content/full/2/2/161/DC1>

## Appendix 2. Study Quality Rating Criteria<sup>1</sup>

### DIAGNOSTIC ACCURACY STUDIES

#### Criteria

Screening test relevant, available for primary care, adequately described?

Study uses a credible reference standard, performed regardless of test results?

Reference standard interpreted independently of screening test?

Handles indeterminate results in a reasonable manner?

Spectrum of patients included in study?

Sample size?

Administration of reliable screening test?

#### Definition of Ratings Based on Criteria

**Good:** Evaluates relevant available screening test; uses a credible reference standard; interprets reference standard independently of screening test; reliability of test assessed; has few or handles indeterminate results in a reasonable manner; includes large number (more than 100) broad-spectrum patients with and without disease.

**Fair:** Evaluates relevant available screening test; uses reasonable, although not best, standard; interprets reference standard independent of screening test; moderate sample size (50 to 100 subjects) and a "medium" spectrum of patients.

**Poor:** Has important limitation, such as uses inappropriate reference standard; screening test improperly administered; biased ascertainment of reference standard; very small sample size of very narrow selected spectrum of patients.

### RANDOMIZED CONTROLLED TRIALS AND COHORT STUDIES

#### Criteria

Initial assembly of comparable groups: randomized controlled trials (RCTs)—adequate randomization, including concealment and whether potential con-

founders were distributed equally among groups; cohort studies—consideration of potential confounders with either restriction or measurement for adjustment in the analysis; consideration of inception cohorts?

Maintenance of comparable groups (includes attrition, crossovers, adherence, contamination)?

Important differential loss to follow-up or overall high loss to follow-up?

Measurements: equal, reliable, and valid (includes masking of outcome assessment)?

Clear definition of interventions?

Important outcomes considered?

Analysis: adjustment for potential confounders for cohort studies, or intention-to-treat analysis for RCTs?

#### Definition of Ratings Based on Criteria

**Good:** Meets all criteria: comparable groups are assembled initially and maintained throughout the study (follow-up at least 80%); reliable and valid measurement instruments are used and applied equally to the groups; interventions are spelled out clearly; important outcomes are considered; and appropriate attention to confounders in analysis.

**Fair:** Studies will be graded "fair" if any or all of the following problems occur, without the important limitations noted in the "poor" category below: generally comparable groups are assembled initially but some question remains whether some (although not major) differences occurred in follow-up; measurement instruments are acceptable (although not the best) and generally applied equally; some, but not all, important outcomes are considered; and some, but not all, potential confounders are accounted for.

**Poor:** Studies will be graded "poor" if any of the following major limitations exists: groups assembled initially are not close to being comparable or maintained throughout the study; unreliable or invalid measurement instruments are used or not applied at all equally among groups (including not masking outcome assessment); and key confounders are given little or no attention.

## CASE CONTROL STUDIES

### Criteria

- Accurate ascertainment of cases?
- Nonbiased selection of cases/controls with exclusion criteria applied equally to both?
- Response rate?
- Diagnostic testing procedures applied equally to each group?
- Measurement of exposure accurate and applied equally to each group?
- Appropriate attention to potential confounding variable?

### Definition of Ratings Based on Criteria

**Good:** Appropriate ascertainment of cases and nonbiased selection of case and control participants;

exclusion criteria applied equally to cases and controls; response rate equal to or greater than 80%; diagnostic procedures and measurements accurate and applied equally to cases and controls; and appropriate attention to confounding variables.

**Fair:** Recent, relevant, without major apparent selection or diagnostic workup bias but with response rate less than 80% or attention to some but not all important confounding variables.

**Poor:** Major selection or diagnostic workup biases, response rates less than 50%, or inattention to confounding variables.

---

### Reference

1. Harris RP, Helfund M, Woolf SH, et al. Current methods of the US Preventive Services Task Force: a review of the process. *Am J Prev Med.* 2001;20:21-35.
